# Supplementary material for: Combinatorial immunotherapies overcome MYC-driven immune evasion in triple negative breast cancer
Source: PubMed Central journal article supplement (PMC9237085; doi:10.1038/s41467-022-31238-y), 2022-06-27

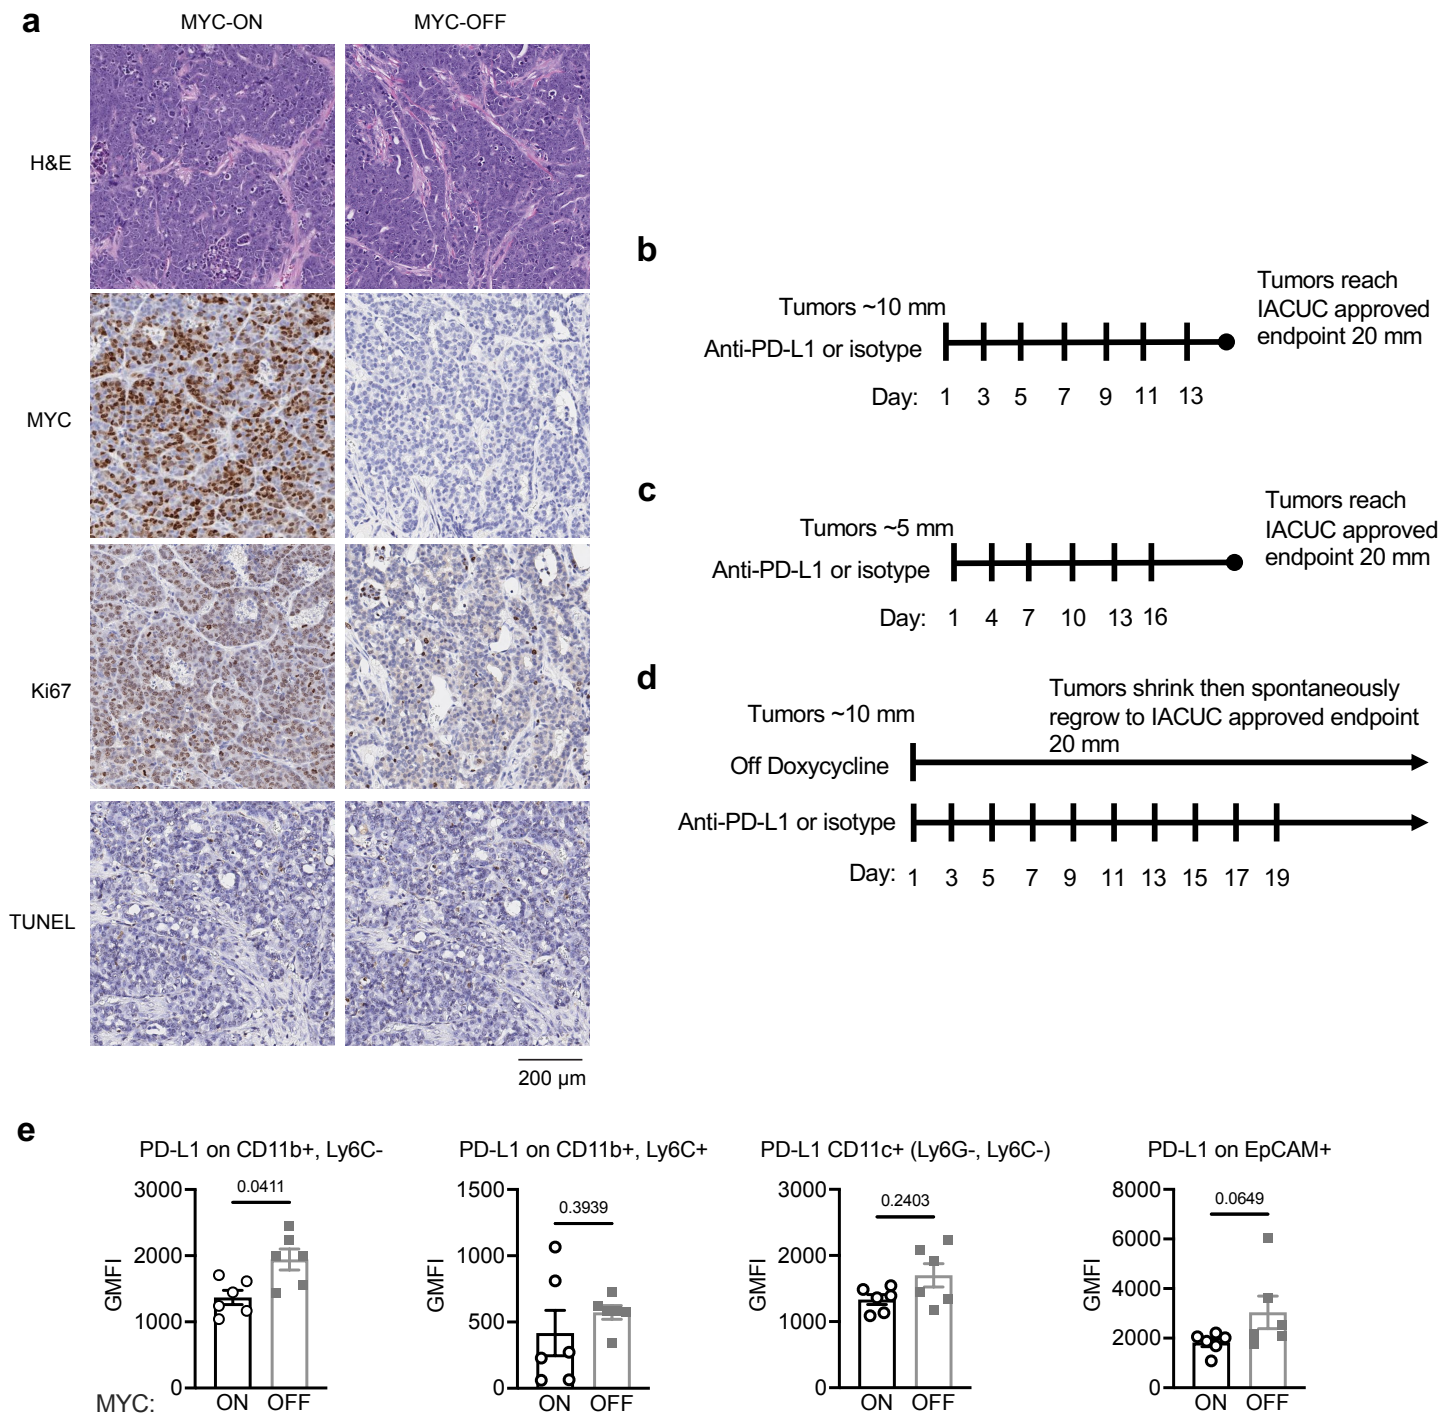

**Supplementary Fig. 1: The MYC-driven breast model for testing anti-PD-L1.** (a) Hematoxylin and Eosin staining, immunohistochemistry DAB staining for MYC, Ki67, and TUNEL in tumors from a representative animal on doxycycline chow (MYC-ON, n=3) or a representative animal 3 days off doxycycline chow (MYC-OFF, n=2). (b-d) Timeline for treatment related to Figure 1: Anti-PD-L1 or isotype control antibody was administered on days marked by the tick marks. (b) Female FVB/N mice were randomized into treatment arms once transplanted tumors reached approximately 10 mm in length (longest length in any direction). (c) Female C57BL/6 mice were randomized into treatment arms once injected tumors formed 5 mm in length (longest in any direction). (d) Female FVB/N mice were taken off doxycycline and randomized into anti-PD-L1 or isotype antibody once transplanted tumors reached 10 mm in length (longest in any direction). (e) Flow cytometry analysis of surface PD-L1 expression on cells found in MYC-ON tumors (n=6) or MYC-OFF tumors (off doxycycline chow for 3 days) (n=6). Data points are individual animals, mean $\pm$ SEM. Two-sided, Mann-Whitney test, p values displayed above the bar graph. Source data are provided in the Source Data file.

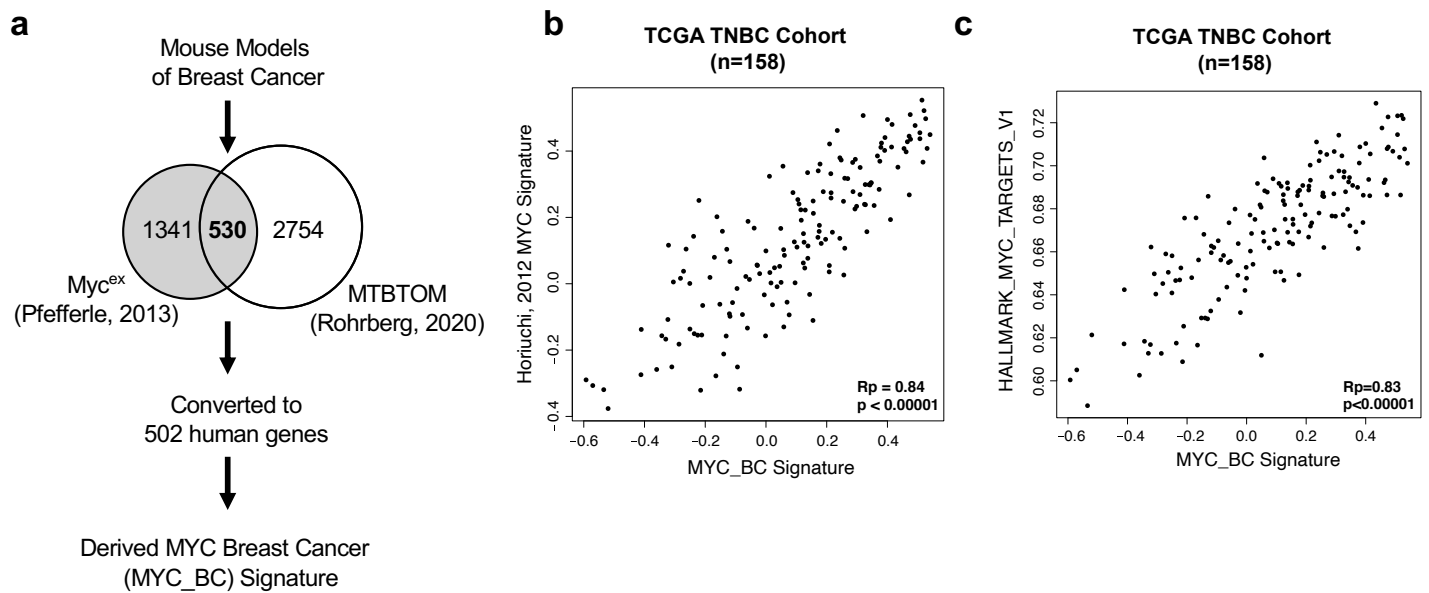

**Supplementary Fig. 2: Breast tumor-derived MYC signature (MYC\_BC) correlates with published MYC signatures.** (a) Diagram depicting derivation of the MYC Breast Cancer (MYC\_BC) Signature (502 genes available in Supplementary Dataset 1). (b) Pearson correlation was assessed between MYC\_BC signature expression and 352 gene MYC signature (Horiuchi, 2012; Chandriani, 2009). (c) Pearson correlation was tested between MYC\_BC signature expression and MSigDB MYC v1 gene set signature. TCGA TNBC cohort (n=158). Rp, Pearson's correlation coefficient, and adjusted p value, exact value shown unless below 0.00001. Source data are provided in the Source Data file.



### TCGA TNBC (n=158)

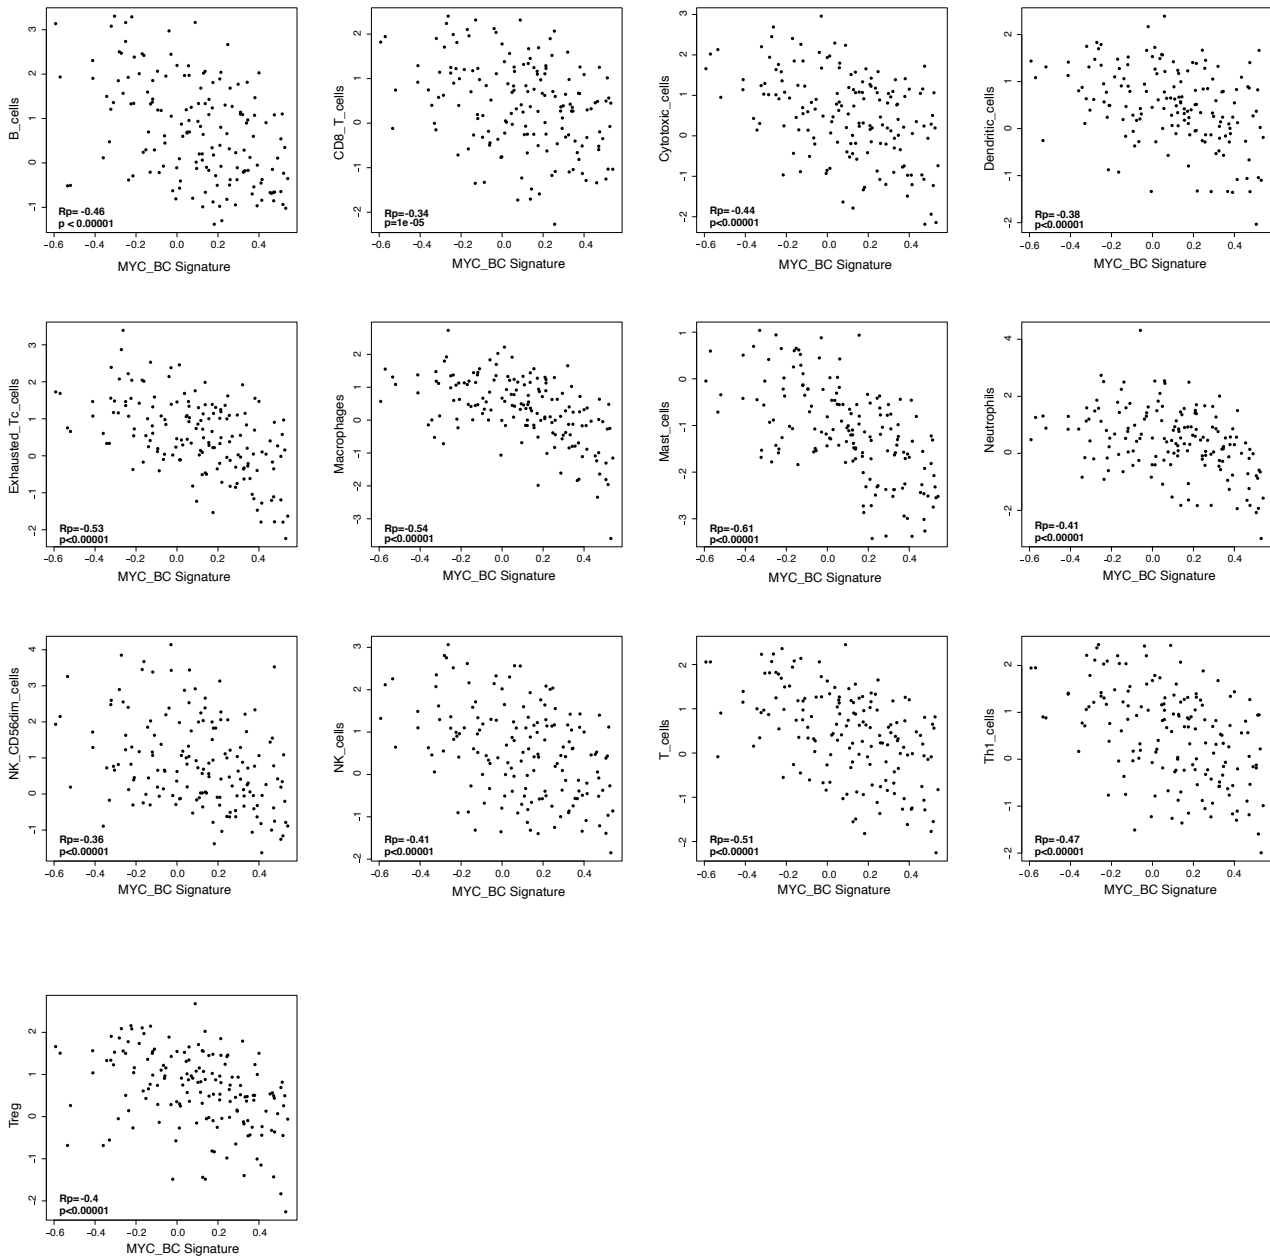

**Supplementary Fig. 3: MYC\_BC signature is anti-correlated with multiple immune cell signatures.** Pearson correlation tested between MYC\_BC signature expression and published immune signatures from Danaher, 2017. TCGA TNBC cohort (n=158). Rp, Pearson's correlation coefficient, and adjusted p value, exact value shown unless below 0.00001. Source data are provided in the Source Data file.

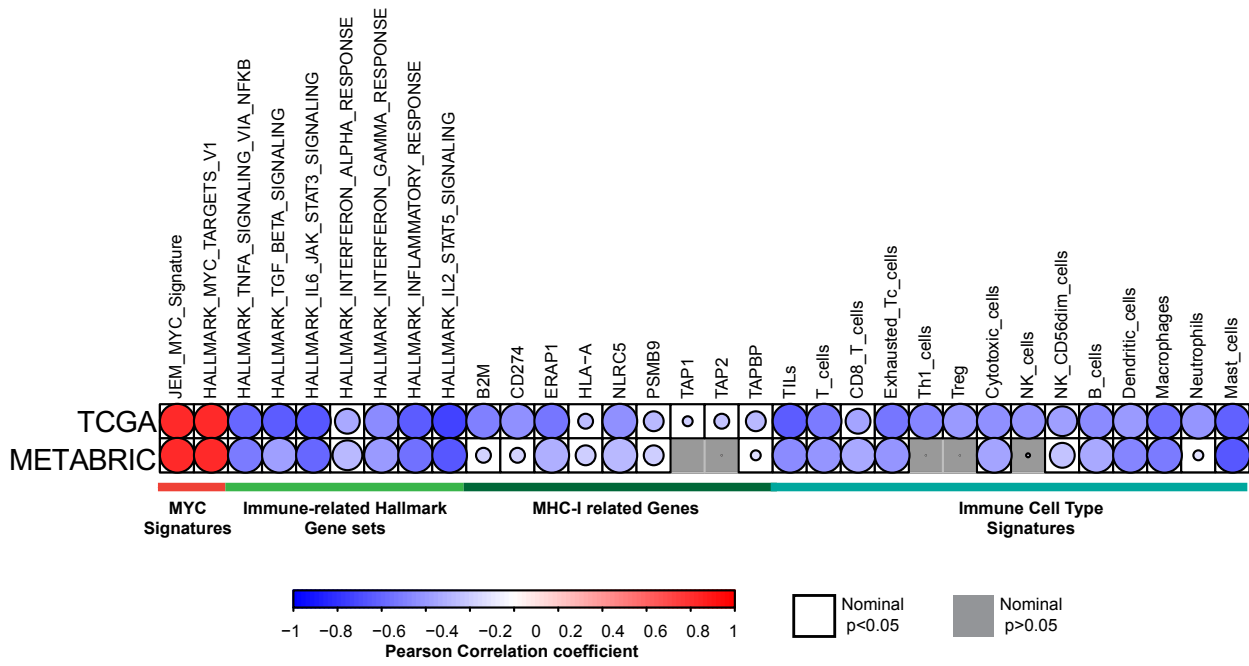

**Supplementary Fig. 4: MYC\_BC signature is anti-correlated with immune signatures in TCGA and METABRIC.** Immune signatures and genes of interest tested for Pearson correlation with the MYC\_BC signature result in similar trends in TCGA TNBC patient dataset and the METABRIC TNBC dataset. Pearson's correlation coefficient scores were computed and displayed in color for comparison. Source data are provided in the Source Data file.

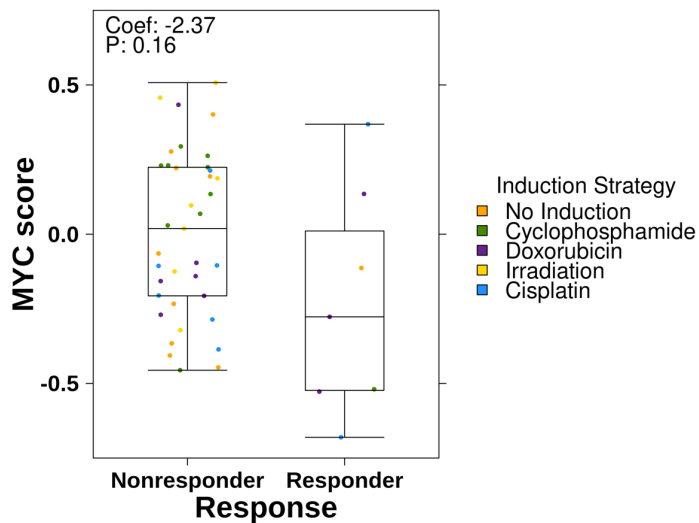

**Supplementary Fig. 5: TONIC Trial.** Comparison of the MYC\_BC signature (MYC\_Score) between responders (n=7) and non-responders (n=37), post-induction, using a logistic regression model correcting for induction strategy. Box and whiskers plot showing median, 0.25 and 0.75 quantiles, with whiskers at 1.5X interquartile range. Spearman's coefficient (Coef) and exact p value (P) displayed in upper left corner of the graph. Source data are provided at EGA (EGAS00001003535).

## TCGA TNBC (n=158)

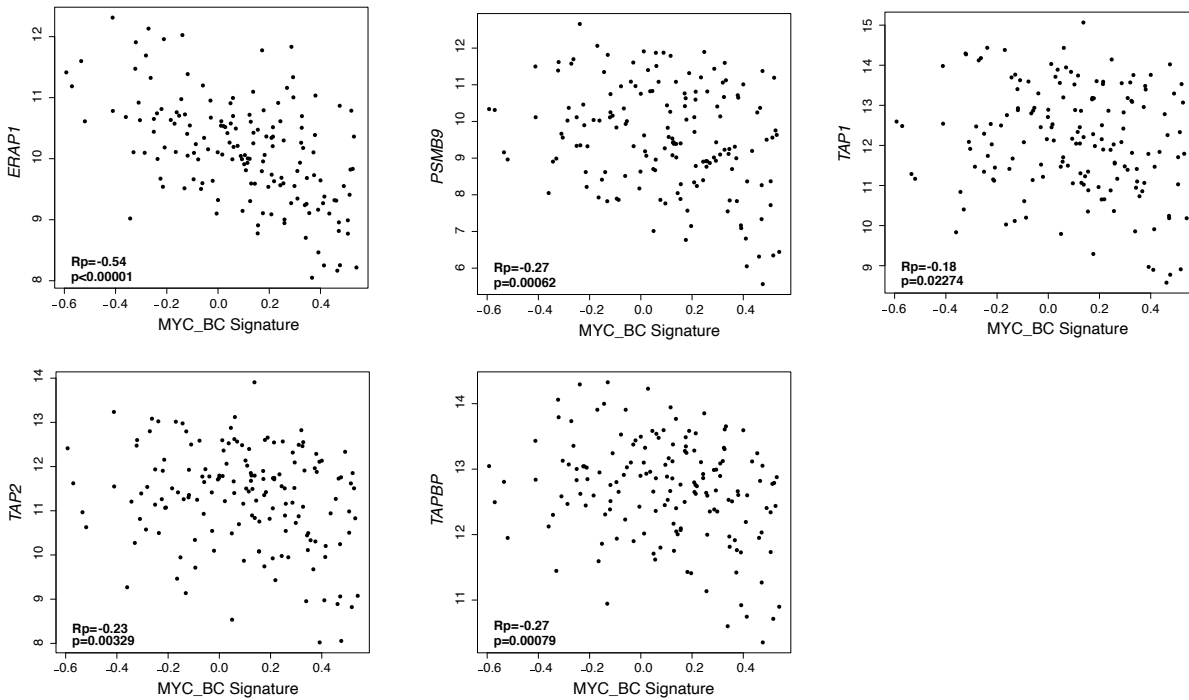

**Supplementary Fig. 6: MYC<sub>BC</sub> signature is anti-correlated with genes required for MHC-I antigen presentation.** Pearson correlation (Rp) tested between MYC<sub>BC</sub> signature and expression score for each gene in TCGA TNBC cohort (n=158). Adjusted p value, exact value shown unless below 0.00001. Source data are provided in the Source Data file.

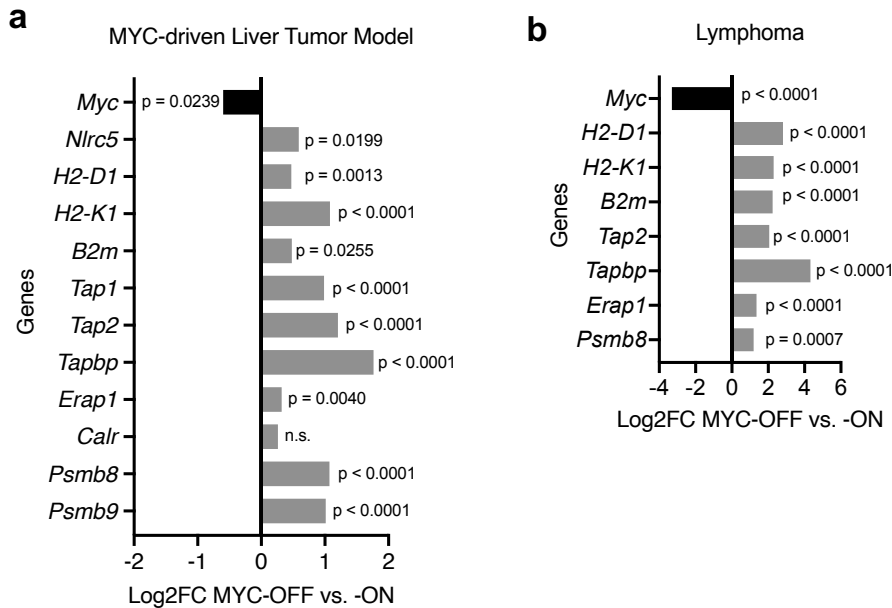

**Supplementary Fig. 7: When MYC is turned off in other MYC-driven models, antigen presentation genes are upregulated.** (a) RNA-seq data in a liver cancer model published by Kress et al, 2016: MYC-ON compared with MYC-OFF. Adjusted p values analyzed and reported by Kress et al. Source data available on the Gene Expression Omnibus (GEO) repository under GSE76078. (b) RNA-seq dataset in lymphoma cells published in Rohrberg et al 2020: MYC-OFF state compared to MYC-ON state. Adjusted p value, exact value shown unless below 0.0001, analyzed and reported in Rohrberg et al. Source data available on the GEO repository under GSE130922.

## Genes Downregulated by MYC

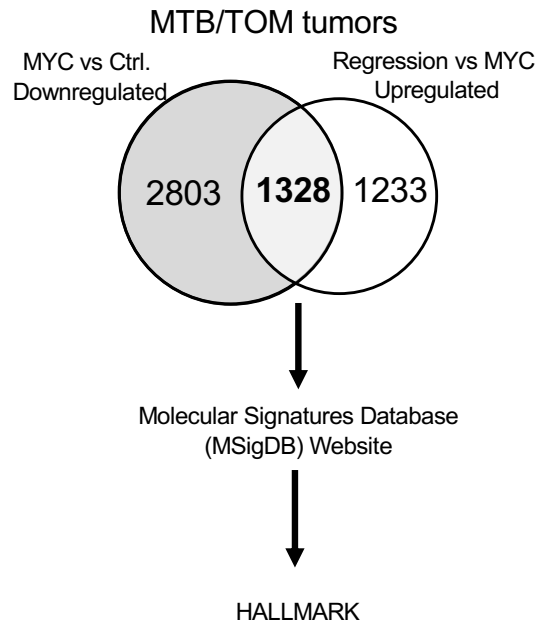

**Supplementary Fig. 8: Identification of genes downregulated by MYC.** The differential expression data was downloaded from Rohrberg, 2020 (GSE130922). Genes with a 2-fold change in expression and an adjusted p-value < 0.05 were selected from the published analysis. The two lists were compared using online tool Venny 2.0 (<https://bioinfoq.cnb.csic.es/tools/venny/index.html>) Overlapping genes were entered into GSEA/MSigDB (<https://www.gsea-msigdb.org/gsea/msigdb>) for evaluation of significant overlap with top 10 MSigDB HALLMARK collection.



### Saline

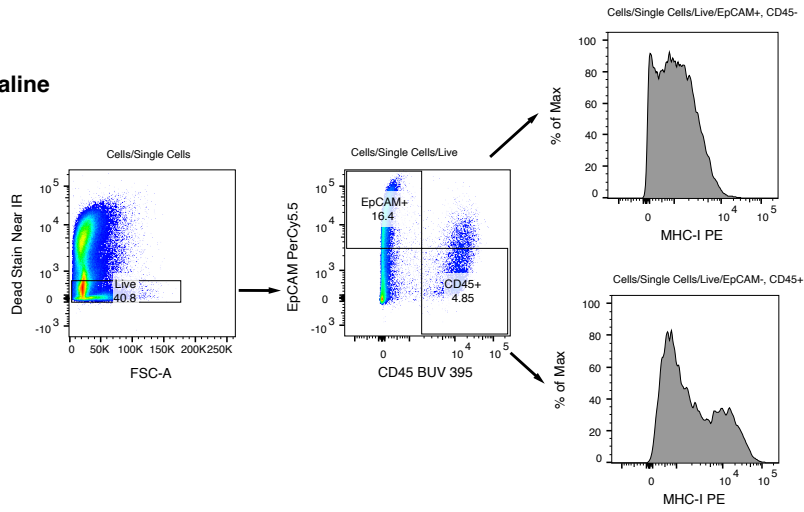

### CpG

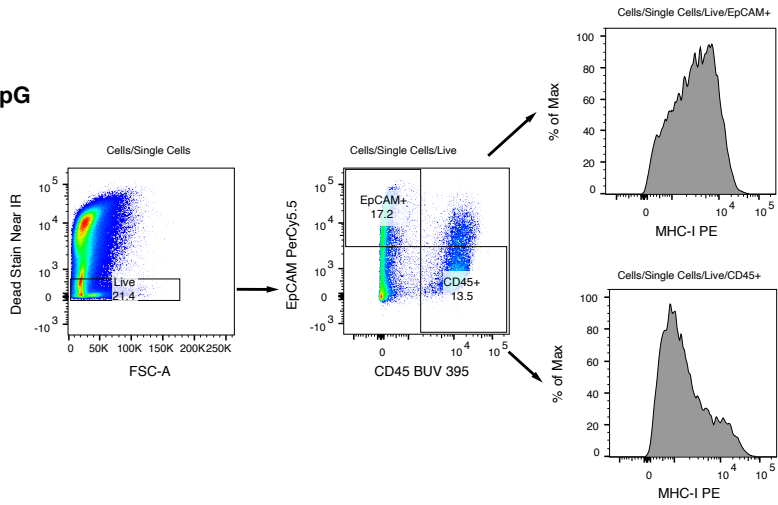

**Supplementary Fig. 9. Gating strategy for MHC-I in CpG treated tumors:** Cells were gated on size and granularity (SSC-A, FSC-A), Singlets (FSC-H, FSC-A), Live (negative stain), and EPCAM+, CD45- or EPCAM-, CD45+.

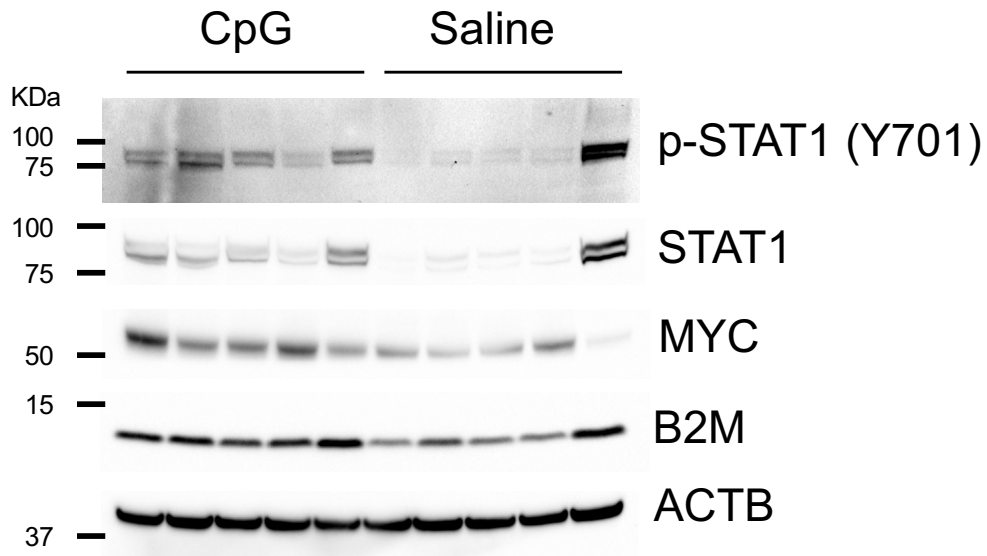

**Supplementary Fig. 10. MYC expression does not change in CpG treated tumors.** Western blot analysis in MTB/TOM tumors. Animals bearing MTB/TOM tumors were randomly selected to receive treatment with CpG (n=5) or saline (n=5) once tumors reached 5 mm in any direction. Tumors were harvested 48 hours post-injection. Phosphorylated-STAT1 (p-STAT1) and B2M were run on a second gel. Uncropped and unprocessed blots with the ladder displayed are provided in the Source Data file and at the end of this Supplementary Information file.

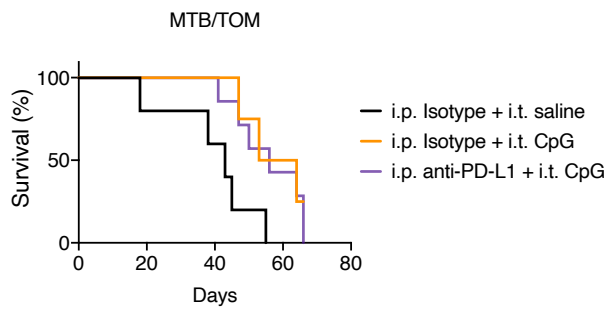

**Supplementary Fig. 11: CpG+anti-PD-L1 does not extend survival beyond CpG alone.** Survival analysis for MTB/TOM treated saline solution or intratumoral (i.t.) CpG and intraperitoneal (i.p.) anti-PD-L1 or isotype control antibody. Median survival was 43 days, 58.5 days and 56 days for n=5 in Isotype + saline (n=5), isotype + CpG (n=4), and anti-PD-L1+CpG (n=7), respectively. Log rank test comparing Isotype+saline to anti-PD-L1+CpG ( $p = 0.0217$ ); Isotype+saline compared to Isotype+CpG ( $p = 0.0527$ ); Isotype+CpG compared to anti-PD-L1+CpG ( $p = 0.5819$ ). Source data are available in the Source Data file.

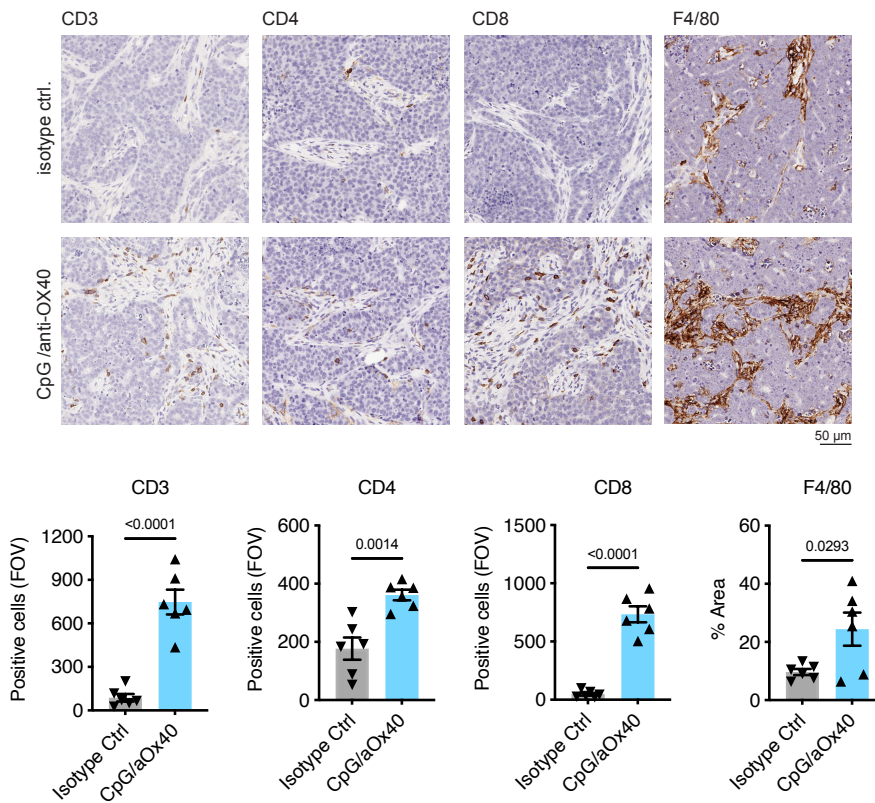

**Supplementary Fig. 12: CpG/aOX40 increases T-cell infiltration.** Immunohistochemistry staining for immune cells in the tumor on day 10 (top) and bar graph (below) depicting counts per field of view (FOV). Images taken at 40X. n=2 animals per group, 3 FOV analyzed per tumor, mean ± S.E.M., two-sided, unpaired t-test, exact p-values shown across the bars, unless values are less than 0.0001. Source data are available in the Source Data file.



## Isotype

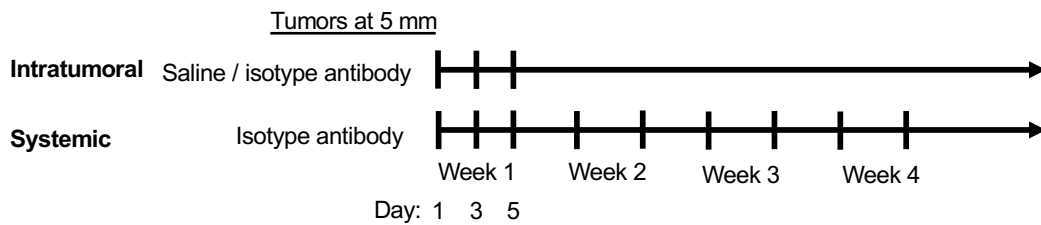

## Anti-PD-L1

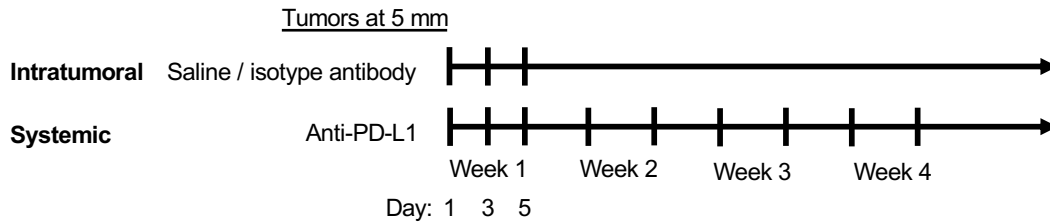

## CpG/aOX40

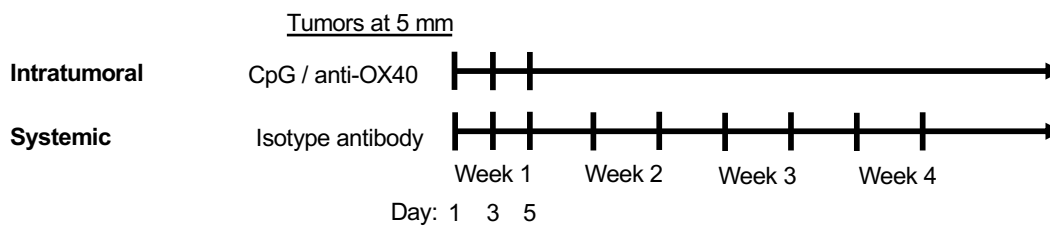

## Triple Combination

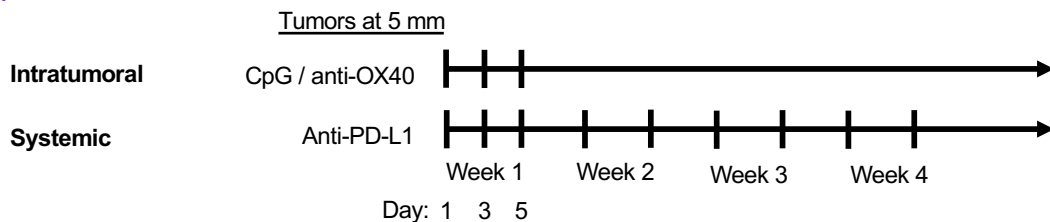

**Supplementary Fig. 13: Treatment schedule related to Figure 4h, i, j, k, l.** Animals were randomized into treatment arms once tumors reached 5 mm in length (longest length in any direction). All agents were administered on days 1, 3, and 5. For MTB/TOM and MC38-MYC models, animals received additional anti-PD-L1 or isotype injections twice a week in week 2, 3, and 4 (total 9 doses); WAP-MYC mice received additional anti-PD-L1 or isotype injections twice in week 2 and once in week 3, and none in week 4 (total 6 doses).

Supplementary Table 1: Pathways enriched in MYC-downregulated genes

**10 Most Downregulated Hallmark Signatures**

| Gene Set Name                              | k/K   | FDR q-value |
|--------------------------------------------|-------|-------------|
| HALLMARK_INTERFERON_GAMMA_RESPONSE         | 0.32  | 2.95E-46    |
| HALLMARK_INTERFERON_ALPHA_RESPONSE         | 0.351 | 3.50E-26    |
| HALLMARK_ALLOGRAFT_REJECTION               | 0.215 | 1.37E-23    |
| HALLMARK_COMPLEMENT                        | 0.165 | 1.22E-14    |
| HALLMARK_INFLAMMATORY_RESPONSE             | 0.16  | 6.51E-14    |
| HALLMARK_APOPTOSIS                         | 0.168 | 2.17E-12    |
| HALLMARK_TNFA_SIGNALING_VIA_NFKB           | 0.145 | 1.11E-11    |
| HALLMARK_APICAL_JUNCTION                   | 0.14  | 4.96E-11    |
| HALLMARK_EPITHELIAL_MESENCHYMAL_TRANSITION | 0.14  | 4.96E-11    |
| HALLMARK_IL2_STAT5_SIGNALING               | 0.135 | 2.05E-10    |

**10 Most Downregulated KEGG Signatures**

| Gene Set Name                               | k/K  | FDR q-value |
|---------------------------------------------|------|-------------|
| KEGG_ANTIGEN_PROCESSING_AND_PRESENTATION    | 0.18 | 1.13E-07    |
| KEGG_JAK_STAT_SIGNALING_PATHWAY             | 0.14 | 1.15E-07    |
| KEGG_FOCAL_ADHESION                         | 0.12 | 1.15E-07    |
| KEGG_FC_GAMMA_R_MEDIATED_PHAGOCYTOSIS       | 0.17 | 3.26E-07    |
| KEGG_VASCULAR_SMOOTH_MUSCLE_CONTRACTION     | 0.15 | 7.08E-07    |
| KEGG_COMPLEMENT_AND_COAGULATION_CASCADES    | 0.19 | 1.30E-06    |
| KEGG_CYTOKINE_CYTOKINE_RECEPTOR_INTERACTION | 0.10 | 1.40E-06    |
| KEGG_TOLL_LIKE_RECEPTOR_SIGNALING_PATHWAY   | 0.15 | 3.77E-06    |
| KEGG_TYPE_I_DIABETES_MELLITUS               | 0.23 | 4.06E-06    |
| KEGG_ALLOGRAFT_REJECTION                    | 0.24 | 9.77E-06    |

**10 Most Downregulated GO: Biological Processes**

| Gene Set Name                                   | k/K  | FDR q-value |
|-------------------------------------------------|------|-------------|
| GO_REGULATION_OF_IMMUNE_SYSTEM_PROCESS          | 0.13 | 1.20E-76    |
| GO_DEFENSE_RESPONSE                             | 0.12 | 1.23E-63    |
| GO_CELL_ACTIVATION                              | 0.13 | 1.20E-59    |
| GO_BIOLOGICAL_ADHESION                          | 0.12 | 1.21E-57    |
| GO_RESPONSE_TO_BIOTIC_STIMULUS                  | 0.12 | 2.22E-56    |
| GO_REGULATION_OF_IMMUNE_RESPONSE                | 0.14 | 1.27E-53    |
| GO_POSITIVE_REGULATION_OF_IMMUNE_SYSTEM_PROCESS | 0.13 | 1.28E-51    |
| GO_IMMUNE_EFFECTOR_PROCESS                      | 0.13 | 1.61E-51    |
| GO_REGULATION_OF_RESPONSE_TO_EXTERNAL_STIMULUS  | 0.13 | 2.23E-50    |
| GO_DEFENSE_RESPONSE_TO_OTHER_ORGANISM           | 0.12 | 1.58E-47    |

Supplementary Table 2: List of Antibodies used for flow cytometry experiments and immunohistochemistry (IHC) staining

| <b>Application</b> | <b>Name</b>   | <b>Company</b>                                          | <b>Clone/Info</b> | <b>Conjugate</b>                |
|--------------------|---------------|---------------------------------------------------------|-------------------|---------------------------------|
| Flow Cytometry     | MHC-I (H-2Db) | eBioscience                                             | 28-14-8           | PE                              |
|                    | CD274 (PD-L1) | Millipore                                               | 10F-9G2           | PE                              |
|                    | CD45          | BD Horizon                                              | 30-F11            | BUV395                          |
|                    | Ep-CAM        | Biolegend                                               | G8.8              | PerCPCy5.5                      |
|                    | FOXP3         | eBioscience                                             | FJK-16S           | FITC                            |
|                    | Granzyme B    | Biolegend                                               | GB11              | AF647                           |
|                    | CD8a          | BD Horizon                                              | 53-6.7            | BUV805                          |
|                    | CD4           | Biolegend                                               | RM4-5             | BV605                           |
|                    | CD25          | Biolegend                                               | PC61              | BV421                           |
|                    |               | LIVE/DEAD™<br>Fixable Near-IR<br>Dead Cell Stain<br>Kit | Invitrogen        | for 633 or 635 nm<br>excitation |
|                    | TCR beta      | Tonbo Biosciences                                       | H57-597           | PerCPCy5.5                      |
| IHC                | CD3           | Histowiz                                                | SP7               |                                 |
|                    | CD8           | Histowiz                                                | 4SM15             |                                 |
|                    | CD4           | Histowiz                                                | EPR19514          |                                 |
|                    | FOXP3         | Histowiz                                                | D6O8R             |                                 |
|                    | F4/80         | Histowiz                                                | BM8               |                                 |
|                    | MYC           | Histowiz                                                | Y69               |                                 |
|                    | TUNEL         | Histowiz                                                | Promega kit       |                                 |
|                    | Ki67          | Histowiz                                                | ab11580           |                                 |

Supplementary Table 3: qPCR primers for mouse genes

| <b>Primer</b>    | <b>5' to 3'</b>                |
|------------------|--------------------------------|
| <i>B2m</i> Fwd   | CAAATGCTGAAGAACGGGAAA          |
| <i>B2m</i> Rev   | ATTCAGTGTGAGCCAGGATATAG        |
| <i>Tapbp</i> Fwd | TGCCAGCCTGATCTACAAATAG         |
| <i>Tapbp</i> Rev | GACTCTACGCATGTGTGTTCT          |
| <i>Tap1</i> Fwd  | CGT TCT CTA CCA GCT TCA GTT C  |
| <i>Tap1</i> Rev  | AAG GAG TCC GGT CCA AGT AT     |
| <i>Tap2</i> Fwd  | CCA GGA GAA CAG AAC ACT GAT G  |
| <i>Tap2</i> Rev  | GCC ACC ACA AGG AAG AAG AA     |
| <i>Nlrc5</i> Fwd | CTCACAGGGCCAAAGATGATAG         |
| <i>Nlrc5</i> Rev | GAGGGAAATTGTGGAAGGAGAG         |
| <i>Psmb8</i> Fwd | GCT ACC CAC AGA GAC AAC TAT TC |
| <i>Psmb8</i> Rev | GAC ATC GGA ACT CTC CAC TTT C  |
| <i>Psmb9</i> Fwd | GGT TAT GTG GAC GCA GCT TAT    |
| <i>Psmb9</i> Rev | ACT AGA GCC ATC TCG GTT CA     |
| <i>Actb</i> Fwd  | GAG GTA TCC TGA CCC TGA AGT A  |
| <i>Actb</i> Rev  | CAC ACG CAG CTC ATT GTA GA     |



Supplementary Table 4: qPCR primers for human genes

| <b>Primer</b>    | <b>5' to 3'</b>         |
|------------------|-------------------------|
| <i>HLA-A</i> Fwd | GAGGAGGAAGAGCTCAGATAGA  |
| <i>HLA-A</i> Rev | GGCAGCTGTCTCACACTTTA    |
| <i>B2M</i> Fwd   | CCAGCGTACTCCAAAGATTCA   |
| <i>B2M</i> Rev   | TGGATGAAACCCAGACACATAG  |
| <i>NLRC5</i> Fwd | GACAAAGGAGTACCCTGCATTA  |
| <i>NLRC5</i> Rev | GGGTCACACTGCCACATATAA   |
| <i>ERAP1</i> Fwd | CAGGTAGGTAGAGCAAGAAGATG |
| <i>ERAP1</i> Rev | TGAAGGAGTGGACACAGTTAAG  |
| <i>CALR</i> Fwd  | CGGTGACGAGGAGAAAGATAAA  |
| <i>CALR</i> Rev  | CTGGCCTTTGTTGCTGAAAG    |
| <i>PSMB8</i> Fwd | CGGGTGAACAAGGTGATTGA    |
| <i>PSMB8</i> Rev | CAGATAGTACAGCCTGCATTCC  |
| <i>PSMB9</i> Fwd | GCTTCACCACAGACGCTATT    |
| <i>PSMB9</i> Rev | TTGCCCAAGATGACTCGATG    |
| <i>MYC</i> Fwd   | GGCTCCTGGCAAAGGTCA      |
| <i>MYC</i> Rev   | CTGCGTAGTTGTGCTGATGT    |
| <i>ACTB</i> Fwd  | GGACCTGACTGACTACCTCAT   |
| <i>ACTB</i> Rev  | CGTAGCACAGCTTCTCCTTAAT  |

Uncropped Supplementary Figure 10

Gel #1: MYC, ACTB, STAT1

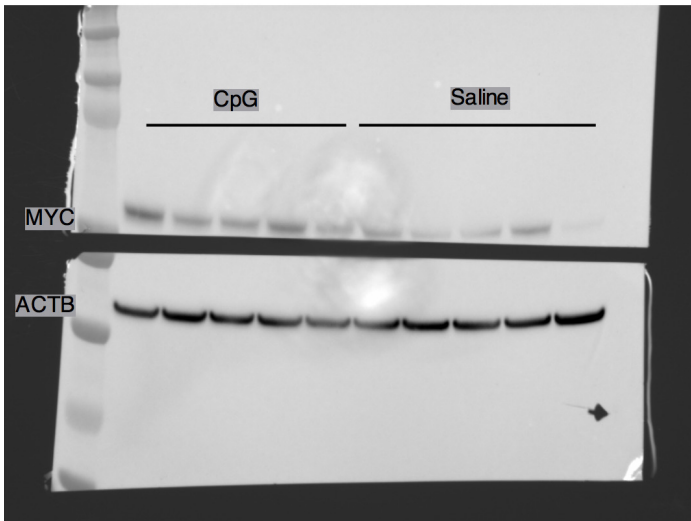

Gel #2: B2M, ACTB, pSTAT1

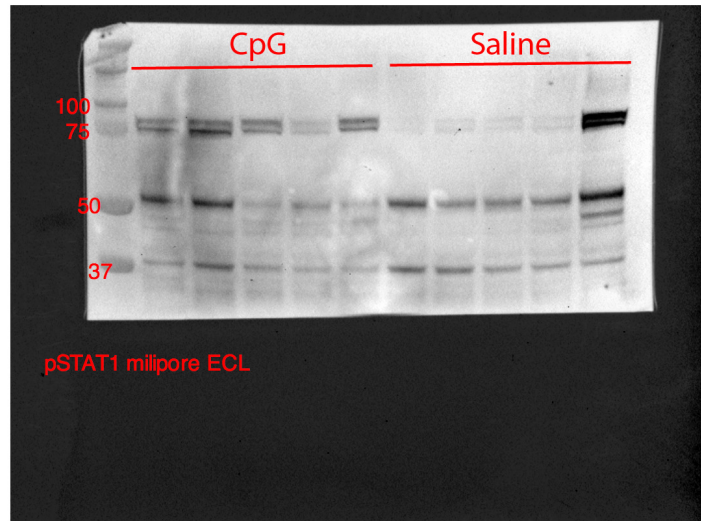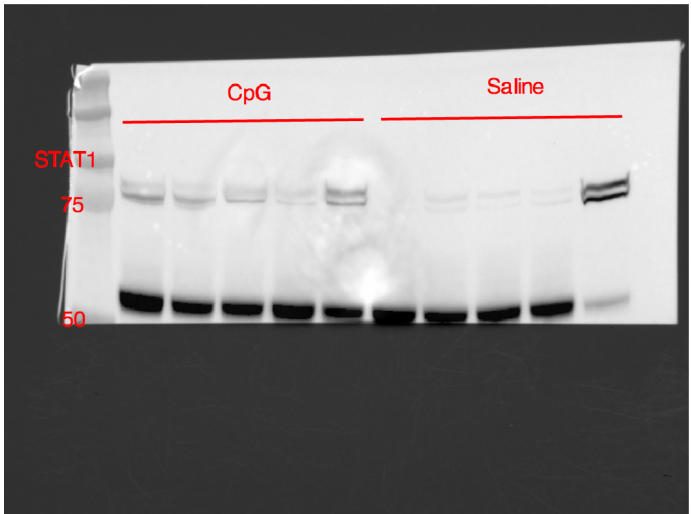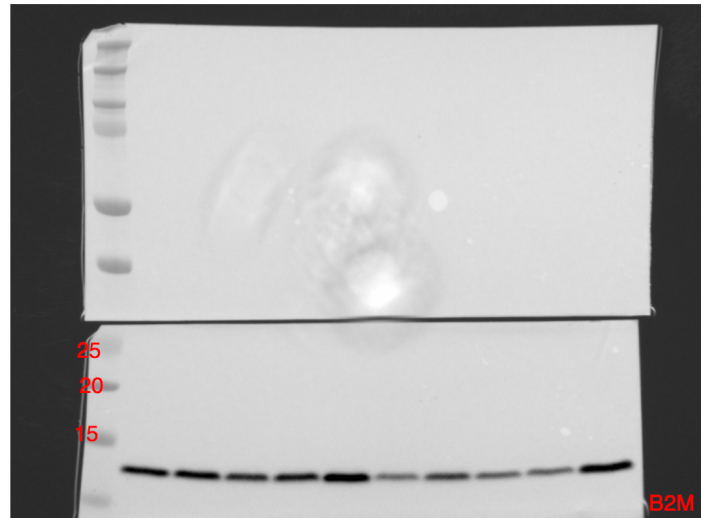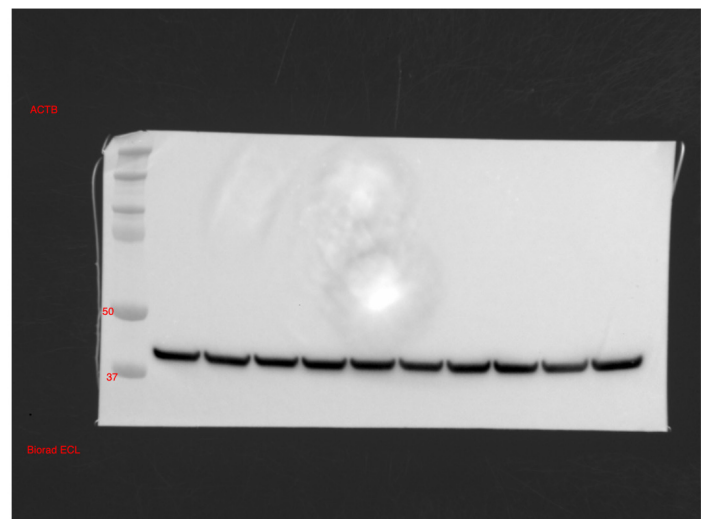

Supplement: 41467_2022_31238_MOESM1_ESM.pdf [file 41467_2022_31238_MOESM1_ESM.pdf]
