# Supplementary material for: Combinatorial immunotherapies overcome MYC-driven immune evasion in triple negative breast cancer
Source: PubMed Central journal article supplement (PMC9237085; doi:10.1038/s41467-022-31238-y), 2022-06-27
Supplement: 41467_2022_31238_MOESM3_ESM.pdf [file 41467_2022_31238_MOESM3_ESM.pdf]

Title: Supplementary Dataset 1

Description: Genes in the MYC\_BC signature with the expression directionality
